# 1           **Genomic architecture and sexually dimorphic expression underlying** 2           **immunity in the red mason bee, *Osmia bicornis***

3                                   Jannik S. Möllmann<sup>1\*</sup> and Thomas J. Colgan<sup>1\*</sup>

4           1. Institute of Organismic and Molecular Evolution, Johannes Gutenberg University Mainz,  
5           Hanns-Dieter-Hüsch-Weg 15, 55128 Mainz, Germany.

## 6           **\*Corresponding authors:**

7           JSM: [jmoellma@students.uni-mainz.de](mailto:jmoellma@students.uni-mainz.de)

8           TJC: [tcolgan@uni-mainz.de](mailto:tcolgan@uni-mainz.de)

## 9           **Abstract**

10          Insect pollinators provide crucial ecosystem services yet face increasing environmental pressures.  
11          The challenges posed by novel and reemerging pathogens on bee health means we need to  
12          improve our understanding of the immune system, an important barrier to infections and disease.  
13          Despite its importance, for certain ecologically important species, such as solitary bees, our  
14          understanding of the genomic basis and molecular mechanisms underlying immune potential, and  
15          how intrinsic and extrinsic factors may influence immune gene expression is lacking. Here, to  
16          improve our understanding of the genomic architecture underlying immunity of a key solitary bee  
17          pollinator, we characterised putative immune genes of the red mason bee, *Osmia bicornis*. In  
18          addition, we used publicly available RNA-seq datasets to determine how sexes differ in immune  
19          gene expression and splicing but also how pesticide exposure may affect immune gene expression  
20          in females. Through comparative genomics, we reveal an evolutionary conserved set of more than  
21          500 putative immune-related genes. We found genome-wide patterns of sex-biased gene  
22          expression, including immune genes involved in antiviral-defence. Interestingly, the expression of  
23          certain immune genes were also affected by exposure to common neonicotinoids, particularly  
24          genes related to haemocyte proliferation. Collectively, our study provides important insights into  
25          the gene repertoire, regulation and expression differences in the sexes of *O. bicornis*, as well as  
26          providing additional support for how neonicotinoids can affect immune gene expression, which may  
27          affect the capacity of solitary bees to respond to pathogenic threats.

28          **Keywords:** immunity, solitary bees, *Osmia*, sex differences, pesticide, gene expression

29 **Short title:** Immune gene expression in the red mason bee.

## 30 **Introduction**

31 Insect pollinators provide key ecosystem services that are essential for the maintenance of  
32 agricultural crop yields, as well as natural biodiversity (Klein, Steffan-Dewenter and Tscharntke,  
33 2003; Losey and Vaughan, 2006; Gallai *et al.*, 2009). Pollination by insects, including social and  
34 solitary bees, is estimated to contribute \$15.2 billion to the US economy demonstrating the  
35 economic benefits provided by such services (Calderone, 2012). Despite the importance of such  
36 services, recent documented declines in bee populations have raised concerns over the continued  
37 provision of such services and related issues with food security (Vanengelsdorp and Meixner,  
38 2010; *European Red List of Bees*, 2014; Goulson *et al.*, 2015). Both abiotic and biotic factors have  
39 been highlighted as contributing factors to decline, including habitat loss and fragmentation,  
40 climate change, increased pesticide usage in modern agriculture, as well as pathogens and  
41 disease (Brown and Paxton, 2009; Goulson *et al.*, 2015).

42 An important barrier to infection and establishment of disease is the invertebrate immune system  
43 (Rolff and Reynolds, 2009; Sadd and Schmid-Hempel, 2009). Despite lacking the adaptive immune  
44 system found in vertebrates, invertebrates have a dynamic innate immune system consisting of  
45 recognition molecules, signalling pathways and effector molecules, which coordinate the targeting  
46 and removal of potentially harmful entities (Hoffmann, 1995). In addition to the evolutionary  
47 importance of the immune system (Sadd and Schmid-Hempel, 2008; Viljakainen, 2015),  
48 understanding insect immunity has applied purposes, especially within the fields of biomedical,  
49 agricultural and conservation biology. Genomic studies on insects have provided novel insights into  
50 the genes and genomic architecture underlying the immune system (Christophides *et al.*, 2002;  
51 Evans *et al.*, 2006; Sackton *et al.*, 2007; Waterhouse *et al.*, 2007; Gerardo *et al.*, 2010). Such  
52 studies have documented and helped understand the immune potential and capacity of a species  
53 through the identification of gene family expansions, contractions, as well as lineage-specific or  
54 novel genes that demonstrate immune function (Adams, 2000; Evans *et al.*, 2006; Barribeau *et al.*,

55 2015). Indeed, comparative genomics allows for examining the types of selection pressures acting  
56 on such genes providing important insights into their evolutionary history. Given the enormous  
57 selection pressures placed upon hosts by pathogens (Combes, 2001), genes involved in the  
58 immune system are expected and have been observed to evolve under strong positive selection.  
59 Indeed, in comparative genomic studies of both vertebrates and invertebrates, including insects,  
60 immune genes are often identified with signatures of accelerated rates of evolution (Viljakainen *et al.*  
61 *et al.*, 2009; Roux *et al.*, 2014; Shultz and Sackton, 2019).

62 Functional genomics, such as genome-wide transcriptional profiling (“RNA-seq”), provide high-  
63 scale resolution of genome-wide changes in gene expression in response to immune or pathogen  
64 challenge but also intrinsic differences in expression between different life cycle stages or sexes  
65 (Fish, 2008; Klein and Flanagan, 2016). Indeed, sexually dimorphic gene expression has been  
66 identified across taxonomically diverse groups and may exist due to differences in life histories,  
67 hormonal abundance, biochemical reactions or sex-specific genomic architecture (Hill-Burns and  
68 Clark, 2009). Such differences can underlie differences in immune expression and function but  
69 also susceptibility to disease and related survival (Ingersoll, 2017). A striking example whereby  
70 sex-specific differences in genomic architecture may underlie differences in immune potential,  
71 activity and expression are members of the Hymenoptera, which include the bees, ants and wasps.  
72 Within this group, sexes differ in their ploidy with females developing from fertilised diploid eggs  
73 while males develop from unfertilised haploid eggs (Pamilo and Crozier, 1981). The haploid nature  
74 of males means that any alleles carried are automatically expressed and open to selection, which  
75 can result in the rapid removal of maladaptive deleterious alleles from the gene pool (Joseph and  
76 Kirkpatrick, 2004). The haploid nature of males has led to predictions that they are more  
77 susceptible to environmental challenges, such as pathogens (O’Donnell and Beshers, 2004),  
78 although empirical evidence to support this view has been conflicting (Baer *et al.*, 2005; Calleri *et al.*  
79 *et al.*, 2006; Ruiz-González and Brown, 2006; Colgan *et al.*, 2011; Retschnig *et al.*, 2014).

80 Despite the fact that pathogen exposure and intrinsic differences can affect or influence immune  
81 gene expression, other factors can also have an influence, including nutritional status (Moret and

82 Schmid-Hempel, 2000; DeGrandi-Hoffman and Chen, 2015), mating (Peng, Zipperlen and Kubli,  
83 2005; Lawniczak *et al.*, 2007; Barribeau and Schmid-Hempel, 2017), periods of senescence or  
84 dormancy (Nakamura *et al.*, 2011; Kubrak *et al.*, 2014; Colgan *et al.*, 2019), as well as  
85 environmental factors, such as temperature (Xu and James, 2012; Chen, Nolte and Schlötterer,  
86 2015). One environmental challenge that has received considerable attention of late is the  
87 influence of pesticide exposure on immune expression and function. Chemical pesticides, such as  
88 pyrethroids and neonicotinoids, interact with the insect nervous system resulting in paralysis and  
89 death (Matsuda *et al.*, 2001). The efficacy of chemicals, such as neonicotinoids, combined with its  
90 lower toxicity to vertebrates, their systemic mode of action, as well as the lack of requirement for  
91 reapplication has resulted in their increased use in modern agricultural practices (Jeschke and  
92 Nauen, 2008). Despite their efficacy in killing agricultural pest species, the ubiquitous distribution of  
93 neonicotinoids across tissues means that non-target insects, including beneficial pollinators, may  
94 come in contact with such chemicals through food resources, such as nectar and pollen  
95 (Blacquièrè *et al.*, 2012). The concentration of such chemicals can result in sublethal and indirect  
96 effects on the insect phenotype and has been identified to adversely affect the behaviour (Gill,  
97 Ramos-Rodriguez and Raine, 2012; Stanley, Smith and Raine, 2015; Arce *et al.*, 2017, 2018;  
98 Siviter *et al.*, 2018), neurobiology (Moffat *et al.*, 2015, 2016) and gene expression of key ecological  
99 and commercial pollinators (Chaimanee *et al.*, 2016; Beadle *et al.*, 2019; Bebane *et al.*, 2019;  
100 Colgan *et al.*, 2019). In addition, such chemicals have been shown to affect immune expression  
101 and function (Di Prisco *et al.*, 2013; Mason *et al.*, 2013; Chmiel *et al.*, 2019; Brandt *et al.*, 2020)  
102 raising concerns that these effects may influence the ability of an exposed individual to respond to  
103 pathogenic threats (James and Xu, 2012). While studies have identified molecular mechanisms by  
104 which bees can metabolise certain neonicotinoids (Manjon *et al.*, 2018; Beadle *et al.*, 2019;  
105 Troczka *et al.*, 2019), our understanding of changes in immune expression due to neonicotinoid  
106 exposure, especially for solitary bees, is limited.

107 The mason bees (*Osmia* species) are an important group of solitary bee pollinators but are  
108 generally understudied from an immunological perspective. One such species is the red mason

109 bee *Osmia bicornis* (Order Hymenoptera; Family Megachilidae), a common pollinator found across  
110 central Europe, which has been increasingly incorporated into modern agricultural practices  
111 (Gruber *et al.*, 2011). Despite its importance, it faces a number of environmental challenges that  
112 can influence the immune system, including pathogens and parasites (Seidelmann, 2006;  
113 Schoonvaere *et al.*, 2018; Tian *et al.*, 2018; Bramke *et al.*, 2019), as well as pesticides (Brandt *et al.*,  
114 *et al.*, 2020). Similarly, intrinsic differences between the sexes, which differ in morphology,  
115 physiology, behaviour and ploidy (Dmochowska-Ślęzak *et al.*, 2015; Rogers, Frasnelli and  
116 Versace, 2016; Szentgyörgyi *et al.*, 2017), may result in differences in immune expression and  
117 associated susceptibility to pathogenic threats. However, at present, our understanding of the  
118 immune gene repertoire and expression in *O. bicornis* is currently limited.

119 To improve our understanding on the immune potential of *O. bicornis*, we performed a comparative  
120 genomic analysis to identify the immune gene repertoire of the red mason bee as well as identify  
121 potential contractions and expansions of important gene families and determine whether the red  
122 mason bee is missing immune genes. Furthermore, to understand how genes underlying immunity  
123 may be expressed differently between the sexes, we investigated evidence of sex-biased gene  
124 expression and alternative splicing. Lastly, as pesticides can negatively affect different aspects of  
125 *Osmia* health, including developmental rate (Mokkapat, Bednarska and Laskowski, 2021), foraging  
126 behaviour (Boff *et al.*, 2021; Straub *et al.*, 2021), reproductive output (Sandrock *et al.*, 2014;  
127 Woodcock *et al.*, 2017; Ruddle *et al.*, 2018), thermoregulation (Azpiazu *et al.*, 2019), as well as  
128 impact immune function in red mason bees (Brandt *et al.*, 2020), we examined whether  
129 neonicotinoid-exposed individuals differed in immune gene expression.

## 130 **Results**

### 131 **Putative expanded immune gene repertoire in the Hymenoptera**

132 To infer putative immune genes in *O. bicornis*, we independently examined the presence of  
133 homologues of previously characterised immune genes of the fruit fly, *Drosophila melanogaster*,  
134 and the closely related earth bumblebee, *Bombus terrestris* in the *O. bicornis* predicted proteome.

135 We merged resulting *O. bicornis* homologues of known immune genes in *D. melanogaster* and *B.*  
136 *terrestris*, resulting in a total of 541 putative immune gene homologues, of which 99 were only  
137 found among the set of *B. terrestris* immune genes, 387 were only found among the set of *D.*  
138 *melanogaster* immune genes and 55 were found among both sets (Figure 1A, Supplemental File  
139 S1). We also ran functional enrichment analyses and found enrichment in immune terms for the  
140 putative immune genes derived uniquely via homology to *D. melanogaster* and for the putative  
141 immune genes found among both sets while for the putative immune genes derived uniquely via  
142 homology to *B. terrestris* we found enrichment in terms only indirectly linked to the immune system  
143 such as “response to stress” and “response to toxic substance” (Supplemental File S2).

144 Given that previous genomic studies on immune gene repertoires in hymenopterans have  
145 described lower gene counts, and since *O. bicornis* is more evolutionarily distantly related to *D.*  
146 *melanogaster* than *B. terrestris*, we further examined immune genes identified only through  
147 homology to *D. melanogaster* to determine confidence in homology. For this, we examined the  
148 sequence identity of homologous immune proteins as calculated by OrthoFinder between *O.*  
149 *bicornis* and *D. melanogaster* revealing higher percentage sequence identity for putative immune  
150 proteins found only in the set of *D. melanogaster* immune proteins compared to immune proteins  
151 found uniquely in the set of canonical *B. terrestris* immune proteins or immune proteins found in  
152 both sets (Figure 1D). As metrics of sequence identity can be influenced by protein length, we  
153 compared predicted protein lengths between homologous pairs, revealing a strong positive  
154 correlation (Pearson’s Product Moment Correlation Coefficient,  $R=0.94$ ,  $p< 2.2e-16$ , Figure 1B-C).  
155 Lastly, we examined if homologous sequences shared the same type and number of functional  
156 domains, which would potentially suggest conserved function. We found identical domain  
157 annotations for a high percentage (71.01%,  $n=722$ ) of all homologous pairs between *O. bicornis*  
158 and *D. melanogaster* with on average 90.05% of the domains shared between pairs.

159 Our analysis also revealed immune genes potentially missing in *O. bicornis*. We did not identify  
160 homologues for 232 *D. melanogaster* immune genes as well as one canonical *B. terrestris* immune  
161 gene, the antimicrobial peptide abaecin, in *O. bicornis* or its sister taxa, *O. lignaria* (Supplemental

162 File S1). Inversely, as *Osmia* may contain lineage specific genes, including genes with potential  
163 immune functions, we identified genes (n=78, split across 48 orthogroups; Supplemental File S1)  
164 shared between *O. bicornis* and *O. lignaria* that lacked homologues in the predicted proteomes of  
165 all other 19 insect species we used to infer homology relations (for species list see Experimental  
166 Procedures). Among the *Osmia*-specific genes that were annotated with at least one domain  
167 (n=24), we find 16 genes annotated with ribonuclease-domains (IPR036397, IPR012337) as well  
168 as one gene (LOC114879997) annotated with a rhabdovirus nucleoprotein domain (IPR004902).

169 To understand variation in the immune gene complement of the red mason bee, we compared the  
170 number of putative *O. bicornis* immune genes in conserved gene families and pathways to the  
171 number of homologues in three closely-related hymenopteran species (*O. lignaria*, *B. terrestris* and  
172 *A. mellifera*) and one more distantly-related fly species (*D. melanogaster*). We found similar  
173 numbers of genes in the four hymenopterans for most signaling pathways or non-pathway gene  
174 families, with slightly lower gene numbers in the two *Osmia* species compared to the other two  
175 hymenopterans for the Immune deficiency (ImD) and Toll pathways (Figure 2A) and higher  
176 numbers for inhibitors of apoptosis in *B. terrestris* (n=13) compared to the other hymenopterans  
177 (n=4 to 5, Figure 2B). When comparing the hymenopterans to *D. melanogaster*, the latter has  
178 higher gene counts for six out of 14 signaling pathways and 13 out of 22 non-pathway gene  
179 families but similar numbers for all other pathways and gene families. In addition, we checked the  
180 number of homologues in *O. bicornis* for *D. melanogaster* immune genes on a gene family level  
181 and found a high average conservation of 84.86% but a large difference for antimicrobial peptides  
182 with only one *O. bicornis* homologue compared to 22 *D. melanogaster* genes.

### 183 **Sex-biased differential expression of immune genes**

184 To provide functional information on the expression of putative immune genes in *O. bicornis*, we  
185 compared whole-bodied transcriptomes of male (n=3) and female adults (n=4). We identified 4,128  
186 genes (34.99% of total gene count, n=11,799) as significantly differentially expressed (Likelihood-  
187 ratio test, BH-adjusted  $p < 0.05$ ) between the sexes, of which, 2,087 and 2,041 had female- and  
188 male-biased expression, respectively (Supplemental File S3). Among the differentially expressed



189 genes, we found a significant enrichment or depletion (Kolmogorov-Smirnov test,  $p < 0.05$ ) of 125  
190 biological process-associated GO terms, 47 cellular component GO terms and 29 molecular  
191 function GO terms with “cytoplasmic translation”, “cytosolic large ribosomal subunit” and “structural  
192 constituent of ribosome” as the most enriched terms for each of the three ontologies, respectively  
193 (Supplemental File S2). We quantified expression of 520 putative immune genes (96.11% of total  
194 immune genes,  $n=541$ ) in both sexes, of which 222 were differentially expressed (42.69% of total  
195 DEGs) which was significantly more than expected by chance (Fisher’s Exact test,  $p=0.017$ ).  
196 These differentially expressed genes were nearly equally shared between the sexes with slightly  
197 more genes ( $n=118$ ) showing male-biased rather than female-biased expression ( $n=104$ ), a pattern  
198 which did not significantly differ from expectation (Fisher’s Exact test,  $p=0.554$ , Supplemental File  
199 S1). Among the differentially expressed immune genes, we found enrichment or depletion for 28  
200 biological process GO terms, five cellular component GO terms and five molecular function GO  
201 terms with “RNA localization”, “intracellular non-membrane-bounded organelle” and “RNA binding”  
202 as top enriched terms of each of the ontologies, respectively (Figure 3B, Supplemental File S2).  
203 We also analysed the *Osmia*-specific genes for signatures of differential expression and found 15  
204 genes that significantly differed in their expression between the sexes (Supplemental File S1).

### 205 **Sex-biased alternative splicing of immune genes**

206 We also performed alternative splicing analysis and identified 1,019 genes (8.64% of total gene  
207 count,  $n=11,799$ ) significantly differentially spliced (Likelihood-ratio test,  $FDR < 0.05$ ) between the  
208 sexes (Supplemental File S4). These sex-biased genes were significantly enriched or depleted  
209 (Kolmogorov-Smirnov test,  $p < 0.05$ ) for 107 biological process GO terms, 24 cellular component  
210 GO terms and 18 molecular function GO terms with “sarcomere organisation”, “Z disc” and “actin  
211 binding” as the top enriched terms for each ontology, respectively, as well as “immune system  
212 process”, significantly enriched among the biological process GO terms (Supplemental File S2).  
213 We identified 71 putative immune genes as differentially spliced (13.12%) between the sexes,  
214 which is significantly more than expected (Fisher’s exact test;  $p=0.002$ ). In addition, we found  
215 differences between the sexes in the frequency of different splicing events with retained intron



216 events significantly more common in females than in males (Fisher's exact test, BH-adjusted  
217  $p=0.036$ ). For other splicing events, we found a borderline significant male-bias for alternative 3'  
218 splice sites (Fisher's exact test, BH-adjusted  $p=0.051$ ) while we found no significant differences  
219 (BH-adjusted  $p>0.05$ ) for skipped exons, alternative 5' splice sites and mutually exclusive exons.

## 220 **Immune gene expression changes in response to pesticide exposure**

221 For the neonicotinoid exposure analysis we identified 617 genes, including 42 putative immune  
222 genes, significantly differentially expressed (Wald-test, BH-adjusted  $p<0.05$ ) in the group of  
223 thiacloprid-exposed females compared to the untreated control group (Figure 4C, Supplemental  
224 File S3), with a significantly unequal partitioning of 436 genes up-regulated and 181 genes down-  
225 regulated in the thiacloprid-exposed group (Binomial-test,  $p=9.41e-22$ ). Comparing imidacloprid-  
226 exposed females with untreated females, we found 127 genes significantly differentially expressed  
227 (Wald-test, BH-adjusted  $p<0.05$ ), including seven immune genes (Figure 4A). We also found a  
228 significantly unequal partitioning of 89 genes up-regulated and 38 genes down-regulated in the  
229 imidacloprid-exposed group (Binomial-test,  $p=6.97e-5$ ). We found more differentially expressed  
230 immune genes than expected by chance in the thiacloprid-exposed group ( $n=42$  immune genes;  
231 Fisher's exact test,  $p=0.014$ ) but not in the imidacloprid-exposed group ( $n=seven$  immune genes;  
232 Fisher's exact test,  $p=0.515$ ). Five putative immune genes (LOC114878095, LOC114878683,  
233 LOC114881181, LOC114874985, LOC114872156) had increased transcript expression both in  
234 response to thiacloprid and imidacloprid with no significant difference between the log<sub>2</sub> fold change  
235 values for these five genes between the two pesticide treatment groups (Welch's t-test,  $p=0.76$ ,  
236 Supplemental Files S1, S3). In terms of functional enrichment of significantly differentially  
237 expressed immune genes, we found 45 biological process-associated GO terms enriched or  
238 depleted for the thiacloprid-exposed group, as well as five cellular component and eight molecular  
239 function terms with "regulation of hemocyte proliferation", "integral component of plasma  
240 membrane" and "signaling receptor activity" as top enriched terms for each ontology, respectively  
241 (Figure 4D). For the imidacloprid-exposed group, we found 30 biological process GO terms  
242 enriched or depleted among the differentially expressed immune genes as well as four cellular

243 component terms and seven molecular function terms with “transmembrane receptor protein  
244 tyrosine kinase signaling pathway”, “integral component of plasma membrane” and “signaling  
245 receptor activity” as top terms of each of the ontologies, respectively (Figure 4B, Supplemental File  
246 S2). Among the *Osmia*-specific genes we identified three genes differentially expressed between  
247 the thiacloprid-exposed group and control group but no differentially expressed genes between the  
248 imidacloprid-exposed group and the control group (Supplemental File S1).

249 For alternative splicing, we found 142 differentially spliced genes (Likelihood-ratio test, FDR<0.05)  
250 for the thiacloprid-exposed group, including six putative immune genes, while 74 genes were  
251 differentially spliced for the imidacloprid-exposed group, including four putative immune genes.  
252 One immune gene (LOC114880106) was differentially spliced in response to both pesticides  
253 (Supplemental File S4).

## 254 Discussion

255 The insect immune system represents an important barrier against infections and disease and thus  
256 provides a physiological function vital to an individual’s success. While our understanding of the  
257 genomic and molecular bases of immunity in the Hymenoptera has largely been informed by  
258 studies on social bees, for other species, especially solitary bees, such information is limited. Here,  
259 we performed a comparative genomic analysis to characterise genes with potential immune  
260 functions in the genome of the red mason bee, *O. bicornis*. Using a homology-based approach, we  
261 identify an immune gene repertoire enlarged beyond the canonical immune genes previously  
262 described in other hymenopteran genomes. We find extensive differences in immune gene  
263 expression between the sexes, both in terms of expression amplitude and splicing, highlighting  
264 intrinsic regulatory differences in the molecular basis of immunity between males and females.  
265 Lastly, we find immune-related genes differentially expressed in response to neonicotinoid  
266 exposure with greater expression differences in bees exposed to thiacloprid than those exposed to  
267 imidacloprid demonstrating differences in how the molecular phenotype responds to different  
268 neonicotinoid subclasses and how each may influence immune expression.

269 The insect immune system consists of an innate immune response with the ability to detect and  
270 remove a diverse range of pathogenic entities (Beckage, 2008). In addition to behavioural, physical  
271 and chemical defences, it is an important barrier to infection and disease development. The  
272 earliest genomic studies on the Hymenoptera documented a reduction in canonical immune genes  
273 in comparison to other insect orders, most notably in comparison to members of the Diptera  
274 (Evans *et al.*, 2006; Bonasio *et al.*, 2010; Werren *et al.*, 2010; Barribeau *et al.*, 2015). Reasons for  
275 this reduction ranged from the technical (e.g., fragmented genome assembly, missing or truncated  
276 gene models) to the biological level (e.g., novel immune genes and pathways ((Albert *et al.*, 2011;  
277 Dong *et al.*, 2020) or relaxed selection acting on canonical immune genes due to social immunity  
278 (Harpur and Zayed, 2013)). Here we performed one of the first investigations of the immune gene  
279 repertoire of a solitary bee species.

280 Our initial approach for the detection of putative immune genes was based on homology with  
281 genes annotated with roles in immune system function based on Gene Ontology in the model  
282 organism, *D. melanogaster*, where many such genes have been experimentally validated with  
283 roles in immune function. As many immune genes have been previously shown to evolve under  
284 strong episodic positive selection (Jiggins and Kim, 2007; Viljakainen, 2015; Shultz and Sackton,  
285 2019), which can result in divergence beyond detection through homology searches or the  
286 appearance of novel lineage-specific immune genes, we also investigated homologues in *O.*  
287 *bicornis* of canonical immune genes from the earth bumblebee, *B. terrestris*, a closely related  
288 social insect with an annual life-cycle. As the majority of canonical immune genes identified in *B.*  
289 *terrestris* were generated based on homology searches with other insect genomes, including *D.*  
290 *melanogaster* (Barribeau *et al.*, 2015), we would have expected canonical immune genes in both  
291 species to be annotated with immune process GO terms and therefore, we would have expected to  
292 see a high overlap in immune gene sets. Surprisingly, we found a weak overlap between *Osmia*  
293 homologues identified using both approaches, with only a third of *B. terrestris* canonical immune  
294 genes identified also through homology to *D. melanogaster* immune genes and thus annotated  
295 with immune system GO terms. The other two thirds were annotated with GO terms associated

296 only more indirectly with immunity, such as “response to toxic substance”, “RNA interference” and  
297 “autophagy”. The lack of annotation of immune GO terms for two thirds of the described canonical  
298 immune genes in *B. terrestris* may result in the underreporting of immunological changes for  
299 genomic studies reliant on GO term based analyses.

300 To provide better support for conserved function for putative immune homologues in *Osmia*, we  
301 further assessed *O. bicornis* immune homologues identified through the *D. melanogaster*  
302 comparison, which lacked a described homologue in *B. terrestris* canonical immune genes. If such  
303 homologues were spurious or low quality matches, we predicted such protein homologues may  
304 have lower percentage sequence identity, greater differences in sequence length, as well as  
305 variation or lack of structural features, such as abundance and diversity of functional domains  
306 compared to canonical immune genes. However, for the majority of homologous pairs, we found  
307 the same or greater percentage sequence identity as canonical immune genes, as well as the  
308 presence and conservation of functional domains, suggesting that potential immune functions may  
309 be conserved and perform similar roles in bees. Identified through homology with *D. melanogaster*  
310 immune genes only, we found homologs of many immune relevant genes like defensins,  
311 hemocytin and sickie known to be important to the immune system across different insect species  
312 (Hoffmann and Hetru, 1992; De Gregorio *et al.*, 2002; Lavine and Strand, 2002; Arai *et al.*, 2013;  
313 Ni *et al.*, 2020). Through homology with *B. terrestris* immune genes only, however, we found  
314 homologues of immune genes known to be involved in the insect immune system, like mucins,  
315 galectin-like proteins and superoxide-dismutases (Pace and Baum, 2002; Korayem *et al.*, 2004;  
316 Colinet *et al.*, 2011; Rao *et al.*, 2016), demonstrating the importance of using more than one  
317 species to infer undescribed gene sets via homology. While future experimental studies on their  
318 function will elucidate potential roles in immunity, if any, for these additional candidate genes, their  
319 high number could also speak to the ever-increasing completeness of functional annotation in  
320 insect model organisms, like *D. melanogaster*.

321 Among the 541 putative immune genes of *O. bicornis*, we did not find any major patterns of  
322 immune gene family expansions or contractions in comparison with that of *B. terrestris* and *A.*

323 *mellifera*, suggesting that there were no large-scale recent duplications or losses of genes that  
324 could be imperative to the functioning of the immune system of bees. However, we did find slight  
325 reductions in the number of genes involved in two major immune signaling pathways, Imd and Toll,  
326 when we compared *O. bicornis* and *O. lignaria* to *A. mellifera* and *B. terrestris*. Imd and Toll are  
327 both involved in the induction of antimicrobial peptides (AMPs) (De Gregorio *et al.*, 2002), thus,  
328 fundamental for insect survival in response to pathogen challenge. Related to this, the biggest  
329 difference in immune gene families between *O. bicornis* and *D. melanogaster* was for gene copies  
330 of AMPs. This can be expected as *Drosophila* have evolved a number of AMP gene families, such  
331 as the cecropins, dipterocins and attacins (Imler and Bulet, 2005), which have not been identified in  
332 other hymenopteran genomes (Evans *et al.*, 2006; Barribeau *et al.*, 2015). Consequently, we did  
333 identify the presence of defensin, an evolutionary conserved AMP that possesses antibacterial  
334 properties (Hoffmann and Hetru, 1992), as well as the hymenopteran-specific AMP,  
335 hymenoptaecin (Casteels *et al.*, 1993). However, we did not detect a copy of abaecin, a bacterial-  
336 inducible AMP described in honeybees (Casteels *et al.*, 1990) and bumblebees (Rees, Moniatte  
337 and Bulet, 1997). The conserved lack of abaecin, as well as components of the Imd and Toll  
338 signaling pathways, in the genome assemblies of two *Osmia* species, which were sequenced and  
339 assembled independently, suggests that such missing genes may be true biological signals rather  
340 than technical artefacts. At present the evolutionary consequences of such potential losses, if any,  
341 are unknown, but it suggests at least that differences in the molecular structure of the immune  
342 system do indeed exist for these two solitary bee species compared to these other social bee  
343 species.

344 For species that sexually reproduce, the genome codes for distinct sexes that can differ  
345 dramatically in behaviour, morphology and physiology (Parsch and Ellegren, 2013), including  
346 immunity (Klein and Flanagan, 2016). As immunity can be both energetically costly to maintain and  
347 activate (Rolf and Siva-Jothy, 2003), it can result in metabolic trade-offs with other processes,  
348 such as reproduction (Schwenke, Lazzaro and Wolfner, 2016). Sexes can also differ in immune  
349 investment, which may be reflected in differences in gene expression. Here we found 222 putative

350 immune genes to be differentially expressed between the sexes with the strongest functional  
351 enrichment for terms related to localization and breakdown of RNA and general macromolecules.  
352 This suggests that the sexes may differ in important housekeeping roles, such as RNA and protein  
353 turnover, but also how they respond to challenging macromolecules that need to be localized and  
354 decomposed, such as RNA-viruses and toxins. The case for differences in antiviral defence is  
355 further highlighted by genes, such as endonuclease Dcr-1 or defensin, which have roles in virus  
356 recognition and degradation (Galiana-Arnoux *et al.*, 2006; Brutscher, Daughenbaugh and  
357 Flenniken, 2015), being differentially expressed between the sexes. We found more putative  
358 immune genes than expected by chance to be differentially expressed or differentially spliced  
359 between the sexes suggesting that the molecular differences between the sexes are particularly  
360 pronounced when it comes to immune system processes. We also looked at the expression  
361 differences between sexes in general and found the most striking functional enrichment of  
362 differentially expressed genes to be related to translational and cell division processes, underlining  
363 the generality of molecular differences between the sexes while the most striking enrichment of  
364 alternatively spliced genes is mostly related to muscle activity and regulation of muscle excitation  
365 which might reflect the different life strategies of male and female mason bees where male bees  
366 emerge prior to female bees or thermoregulatory differences.

367 Pesticides, including neonicotinoids, act as agonists of the nicotine acetylcholine receptors,  
368 resulting in disruption of the neuronal cholinergic signal transduction and excitation of neuronal  
369 triggers culminating in paralysis and death (Matsuda *et al.*, 2001). The efficacy of the mode of  
370 action of neonicotinoids has led to their increased popularity in modern agriculture practices yet  
371 recent studies have highlighted the negative impact sublethal and lethal doses can have on  
372 pollinator health ('Neonicotinoids, bee disorders and the sustainability of pollinator services', 2013),  
373 including immune function. Neonicotinoids, such as clothianidin and imidacloprid, have been  
374 identified in exposed honeybees to negatively modulate the NF-kappaB signaling pathway and  
375 affect the ability to mount effective antiviral defences (Di Prisco *et al.*, 2013). Other studies on  
376 neonicotinoids have provided additional evidence of the indirect or direct effects of these

377 neurotoxins on immune function or expression (Brandt *et al.*, 2017, 2020). Here we found changes  
378 in gene expression in response to two classes of neonicotinoids with thiacloprid exposure affecting  
379 the expression of more genes, including immune genes, than imidacloprid. This is in line with other  
380 studies that have looked at thiacloprid exposed red mason bees and observed impairment in  
381 immunity (Brandt *et al.*, 2020) or larval development (Claus *et al.*, 2021). For both neonicotinoids,  
382 we find significantly more genes up-regulated in response to pesticide exposure than expected,  
383 suggesting that overall the exposure to pesticides results in an active response of heightened gene  
384 expression as opposed to a mere passive shift in gene expression. Focusing on immune system  
385 processes, we find more immune genes differentially expressed than expected only in thiacloprid-  
386 treated individuals, suggesting that thiacloprid elicits a stronger immune response than  
387 imidacloprid. Interestingly, of the seven differentially expressed genes with elevated expression in  
388 imidacloprid-exposed bees, five genes were also significantly up-regulated in the thiacloprid-  
389 exposed bees which could possibly point to a common set of immune genes that are up-regulated  
390 in response to neonicotinoid exposure. In terms of functional enrichment of the differentially  
391 expressed immune genes, both pesticide-treated groups share similar terms, related to signaling of  
392 transmembrane receptors, suggesting that the immune genes play a role in signaling in response  
393 to pesticide exposure. In addition, in the thiacloprid-treated group the term “regulation of hemocyte  
394 proliferation” is the most significantly enriched term. Haemocytes fulfill an important role in the  
395 ingestion and break-down of foreign cells and substances in the insect immune system (Lavine  
396 and Strand, 2002). Brandt *et al.* found a reduction in haemocyte density in red mason bees after  
397 exposure to thiacloprid, which is in line with our finding of haemocyte proliferation being  
398 differentially regulated between thiacloprid treated and untreated individuals, suggesting that the  
399 effect of pesticide exposure on haemocyte function may extend down to the molecular level.

## 400 **Conclusions**

401 The red mason bee, *O. bicornis*, is a commercially and ecologically relevant solitary bee species,  
402 whose immune system has not been well-studied yet, albeit being integral to its future chances of  
403 survival when faced with increasing environmental challenges. Here, we utilised a comparative



404 genomic approach to propose a set of genes as part of the immune gene repertoire of *O. bicornis*,  
405 and used RNA-seq data to show that the expression and regulation of these putative immune  
406 genes differs markedly between sexes and responds with heightened expression to treatment with  
407 two neonicotinoid pesticides. Additionally, our findings provide support for the application of a  
408 combined approach to inference of gene families, using homology information of more than one  
409 species of reference. Future studies on *O. bicornis* immunity will benefit from tissue-specific  
410 profiling, as well as tracking gene expression changes in response to different immune challenges.  
411 Similarly the application of population genomics will provide important insights into the recent  
412 selection pressures acting on immune genes of mason bees. Collectively, our study provides novel  
413 insights into the immune system of an important, yet still understudied solitary bee species and  
414 identifies a candidate repertoire of immune genes for future research on the immune system of the  
415 red mason bee.

## 416 **Experimental Procedures**

### 417 **Identification of putative immune genes in the red mason bee**

418 To infer homologues for *O. bicornis* genes that are in other insect species, we ran OrthoFinder  
419 [v.2.5.2](Emms and Kelly, 2019) with proteomes of 21 species, comprising 11 bee species from  
420 three families (Family Megachilidae: *Osmia bicornis*, *Osmia lignaria*, and *Megachile rotundata*;  
421 Family Apidae: *Apis mellifera*, *Ceratina calcarata*, *Eufriesea mexicana*, *Habropoda laboriosa* and  
422 *Bombus terrestris*; and Family Halictidae: *Megalopta genalis*, *Nomia melanderi* and *Dufourea*  
423 *novaeangliae*), as well as 10 non-bee insects (*Drosophila melanogaster*, *Aedes aegypti*,  
424 *Anopheles gambiae*, *Bombyx mori*, *Tribolium castaneum*, *Acyrtosiphon pisum*, *Nasonia*  
425 *vitripennis*, *Solenopsis invicta*, *Polistes dominula* and *Vespa mandarinia*). All proteomes were  
426 obtained from the National Center for Biotechnology Information (NCBI) Reference Sequence  
427 (RefSeq) database. We ran OrthoFinder using the default parameters with the inferred species  
428 trees forming a consensus with the known phylogeny. Given that model organisms, such as *D.*  
429 *melanogaster*, contain the most comprehensive functional annotation of genes with immune

430 function or potential, we examined the *O. bicornis* predicted proteome for putative homologues of  
431 *D. melanogaster* immune genes. To obtain *D. melanogaster* immune-responsive genes, we  
432 queried the FlyBase on the 9th of July, 2021 for any gene associated with the GO term “immune  
433 system process”, the highest order Gene Ontology term associated with the immune system, and  
434 inferred the *O. bicornis* homologues via the homologues table generated earlier. As an additional  
435 approach, to identify immune genes that may be lineage-specific within the Hymenoptera or too  
436 divergent between *O. bicornis* and *D. melanogaster* given their evolutionary distance, we examined  
437 the presence of *O. bicornis* homologues from comparison with canonical immune genes  
438 characterised in the earth bumblebee, *Bombus terrestris*. The canonical *B. terrestris* immune  
439 genes were directly obtained from the most recent earth bumblebee genome papers (Barribeau *et*  
440 *al.*, 2015; Sadd *et al.*, 2015). An additional reason for the inclusion of this social bee species is that  
441 it has a curated homologue list with *D. melanogaster*, available through the Ensembl Metazoa  
442 database, which provided the ability to compare the orthogroups and homologous pairs generated  
443 by OrthoFinder with orthogroups and pairs independently generated by Ensembl, which  
444 incorporates an additional information on synteny and gene order conservation for the identification  
445 of putative homologues between two species. This approach identified a high overlap (86.85% of  
446 Ensembl pairs correctly identified by OrthoFinder) between the pairs generated by both analyses  
447 providing additional confidence in the orthogroups generated by OrthoFinder. Homologous genes  
448 from *D. melanogaster* and *B. terrestris* were obtained by first translating the *O. bicornis* gene-IDs to  
449 protein-IDs via the annotation column in the RefSeq gene feature file (GFF) and then using the  
450 homology information from OrthoFinder to translate *O. bicornis* protein-IDs to *D. melanogaster* and  
451 *B. terrestris* protein-IDs respectively and further translating the protein-IDs to the species-specific  
452 gene-IDs, yielding a many-to-many homologue table of *O. bicornis* gene-ID's to *D. melanogaster*  
453 and *B. terrestris* gene-ID's, respectively. To infer for each gene family how many homologous  
454 genes exist for the set of putative *O. bicornis* immune genes in *A. mellifera*, *B. terrestris*,  
455 *D. melanogaster* and *O. lignaria*, we derived annotation of *D. melanogaster* genes with gene  
456 families from Flybase on the 02nd of June, 2021 and annotated the immune gene homologues in

457 each species with the according gene family description. We then summarised this data by  
458 counting the number of genes in each species and for each gene family.

459 For *O. bicornis* genes that shared homology with *D. melanogaster* immune-responsive genes but  
460 did not overlap with known canonical immune genes in *B. terrestris*, we further examined homology  
461 based on the following criteria: 1) similarity of predicted protein length between homologous pairs;  
462 2) high percentage of protein sequence identity between homologous pairs as inferred via  
463 Diamond searches performed by OrthoFinder; and 3) the number of shared functional protein  
464 domains between homologous as inferred via InterProScan [v5.52-86.0](Jones *et al.*, 2014). The  
465 prediction here is that if two homologous proteins shared similar protein length, high sequence  
466 identity and the same or similar number and types of functional protein domains, potential  
467 functional immune roles may be conserved.

468 In addition to identification of immune-related genes, we also inferred canonical immune genes  
469 from *B. terrestris* or *D. melanogaster* missing in *O. bicornis* and *O. lignaria*. For this, we parsed the  
470 output of OrthoFinder for orthogroups that carried immune-associated genes in *D. melanogaster* or  
471 *B. terrestris* but not in both *O. bicornis* and *O. lignaria*. Similarly, we inferred *Osmia*-specific genes  
472 by parsing orthogroups containing only *O. bicornis* and *O. lignaria* homologues, which were also  
473 absent in the other 19 species.

#### 474 **Quality assessment, transcript abundance estimation and differential expression** 475 **analysis of immune genes between sexes and pesticide-treated groups**

476 To examine the functional expression of putative immune genes of *O. bicornis*, we obtained  
477 publicly available paired-end RNA-seq libraries for two analyses: a) sex-biased analysis containing  
478 males (n=3) and females (n=4); and b) pooled libraries of unexposed ("control"; n=4) females or  
479 those exposed to thiacloprid (n=4) or imidacloprid (n=4). All datasets were obtained from the NCBI  
480 (National Center for Biotechnology Information) Short Read Archive (SRA) database (BioProject:  
481 PRJNA285788; (Beadle *et al.*, 2019), Supplemental File S5). We performed data quality  
482 assessment based on per-sample quality evaluations using FastQC [v.0.11.9](Andrews, 2010)

483 calculation of the proportions of reads mapping to the predicted transcriptome of the RefSeq *O.*  
484 *bicornis* reference genome assembly [Obicornis\_v3; GCF\_004153925.1] using Kallisto [v.0.46.1]  
485 (Bray *et al.*, 2016). We then combined and visualized the results for both tools and across all  
486 samples with MultiQC [v.1.7](Ewels *et al.*, 2016). Based on the results of the quality assessment  
487 we removed adapter sequences and filtered by quality (phred quality score  $\geq 15$ ) and length  
488 (minimum length  $\geq 50$  bp) using fastp [v.0.20.1](Chen *et al.*, 2018). For each sample, we then  
489 aligned the trimmed and filtered reads against the most recent chromosome-level genome  
490 assembly [iOsmBic2.1; GCA\_907164935.1] using STAR [v.2.7.8a](Dobin *et al.*, 2013). As the  
491 chromosome-level assembly currently lacks annotations, we first transferred gene coordinates  
492 from the annotated reference assembly [Obicornis\_v3; GCF\_004153925.1] to the new assembly  
493 using LiftOff [v.1.6.1](Shumate and Salzberg, 2020). STAR was ran in two-pass-mode using the  
494 inferred splice junctions from the first run to improve the alignment of the second run and with  
495 parameter `--quantMode GeneCounts` used to generate gene level abundances of aligned reads  
496 (Supplemental File S6). The mean alignment rate across all samples was 94.09%. For the sex-  
497 biased analysis, we used DESeq2 [v.1.30.1](Love, Huber and Anders, 2014) to correct for library  
498 size and infer all differentially expressed genes (“DEG”, FDR < 0.05) between sexes with a  
499 likelihood-ratio-test (LRT; full model: sex; reduced model: intercept). For the pesticide-based  
500 analysis, we implemented pairwise Wald tests to determine log<sub>2</sub> fold changes between each  
501 pesticide treatment and control, as well as quantify all differences in gene expression between  
502 pesticide treatments. For each analysis, we then parsed DEGs for putative immune genes. To  
503 determine if we identified more or less immune genes than would be expected, we performed  
504 Fisher’s exact tests for each analysis.

505 As a complementary approach to STAR, we also implemented a pseudoalignment-based  
506 differential gene expression analysis using Kallisto [v.0.46.1] as described above in the quality  
507 assessment section (mean mapping rate across samples 87.93%). Similar to the STAR-based  
508 analysis, we implemented the same statistical tests using DESeq2 for both the sex-biased and  
509 pesticide-based analysis, respectively. Out of the genes predicted to be differentially expressed

510 using STAR, 3376 genes (81.78%, n = 4128) were also reported to be differentially expressed  
511 using Kallisto and inversely, 92.01% (n = 3669) of all genes predicted to be differentially expressed  
512 using Kallisto were also predicted to be differentially expressed using STAR.

### 513 **Splicing of immune genes between sexes and pesticide-treated groups**

514 To determine differentially spliced genes between the sexes, as well as in response to pesticide  
515 exposure, we ran rMATS turbo [v.4.1.1](Shen *et al.*, 2014) using the STAR generated alignment  
516 files. Similar to our differential expression analyses, we performed two independent analyses: first,  
517 we compared males and females to identify significant sex-biased differences in splicing; second,  
518 we performed a pesticide-based analysis, comparing thiacloprid- and imidacloprid-exposed  
519 females against the control group, respectively. A specific feature of rMATS is that it outputs event-  
520 level instead of gene-level results, distinguishing between different event types such as exon-  
521 skipping, intron-retainment and 3'- or 5'-splicing and allowing multiple splicing events to be  
522 recognized per gene. We used this event-based information to investigate whether there were  
523 incidences of alternative splicing where a specific splicing event appears preferentially in one of the  
524 experimental groups over the other. To do this we compared the number of times a differential  
525 splicing event had higher inclusion levels in one group over the other against the total number of  
526 incidences of differential splicing for that event using a Binomial-test with the null hypothesis being  
527 that we would see higher inclusion levels equally often for both groups. We then concatenated and  
528 summarised the event-level results by grouping the events by gene-ID and summarising down to  
529 the lowest  $p$  value per gene, yielding a gene-level output table.. We then used this information to  
530 rank genes by  $p$  value and investigate functional enrichment of Gene Ontology (GO) terms in  
531 alternatively spliced genes (below).

### 532 **Gene Ontology term enrichment analysis**

533 As most genes in the *O. bicornis* genome lack functional information, we assigned GO terms to  
534 genes from homologues found in *D. melanogaster*, which were obtained from Ensembl Metazoa  
535 via biomaRt [v.2.46.3](Durinck *et al.*, 2009; Kinsella *et al.*, 2011). We then ran functional  
536 enrichment analyses using topGO [v.2.42.0; (Alexa and Rahnenführer, 2009)] on the sets of

537 immune genes derived via homology to A) *D. melanogaster* uniquely, B) *B. terrestris* uniquely and  
538 C) to both species. To do so we implemented the “classic” algorithm in combination with a Fisher  
539 test (node size=20) using all genes, each marked for presence or absence in the set of putative  
540 immune genes. We then tested for enrichment of the most differentially expressed genes between  
541 sexes and pesticide treatment groups. For this approach, we ranked genes by unadjusted raw  $p$   
542 values to avoid edge-effects introduced by correction and performed a rank-based analysis  
543 (Kolmogorov-Smirnov test with “weighted01” algorithm and a node size=20) . We also performed  
544 an immune-focused GO term enrichment analysis where we populated our GO term database only  
545 with genes annotated with immune-related GO terms.

#### 546 **Data and Code Availability**

547 Data used for the present analysis originated from datasets generated by (Beadle *et al.*, 2019).  
548 Raw sequences for the RNA-seq based analyses can be obtained from the NCBI Short Read  
549 Archive (BioProject PRJNA285788).

## 550 References

- 551 Adams, M. D. (2000) 'The genome sequence of *Drosophila melanogaster*', *Science*, pp. 2185–  
552 2195. doi: 10.1126/science.287.5461.2185.
- 553 Albert, Š. *et al.* (2011) 'Evidence of a novel immune responsive protein in the Hymenoptera', *Insect*  
554 *biochemistry and molecular biology*, 41(12), pp. 968–981.
- 555 Alexa, A. and Rahnenführer, J. (2009) 'Gene set enrichment analysis with topGO', *Bioconductor*  
556 *Improv*, 27. Available at: <http://bioconductor.riken.jp/packages/3.0/bioc/vignettes/topGO/inst/doc/topGO.pdf>.  
557
- 558 Andrews, S. (2010) 'FastQC: a quality control tool for high throughput sequence data', *Reference*  
559 *Source*. Available at: <http://www.bioinformatics.babraham.ac.uk/projects/fastqc/>.
- 560 Arai, I. *et al.* (2013) 'Immunohistochemical analysis of the role of hemocytin in nodule formation in  
561 the larvae of the silkworm, *Bombyx mori*', *Journal of insect science*, 13, p. 125.
- 562 Arce, A. N. *et al.* (2017) 'Impact of controlled neonicotinoid exposure on bumblebees in a realistic  
563 field setting', *The Journal of applied ecology*. Edited by M. Pocock, 54(4), pp. 1199–1208.
- 564 Arce, A. N. *et al.* (2018) 'Foraging bumblebees acquire a preference for neonicotinoid-treated food  
565 with prolonged exposure', *Proceedings. Biological sciences / The Royal Society*, 285(1885). doi:  
566 10.1098/rspb.2018.0655.
- 567 Azpiazu, C. *et al.* (2019) 'Chronic oral exposure to field-realistic pesticide combinations via pollen  
568 and nectar: effects on feeding and thermal performance in a solitary bee', *Scientific reports*, 9(1), p.  
569 13770.
- 570 Baer, B. *et al.* (2005) 'Examination of the immune responses of males and workers of the leaf-  
571 cutting ant *Acromyrmex echinator* and the effect of infection', *Insectes sociaux*, 52(3), pp. 298–  
572 303.
- 573 Barribeau, S. M. *et al.* (2015) 'A depauperate immune repertoire precedes evolution of sociality in  
574 bees', *Genome biology*, 16, p. 83.
- 575 Barribeau, S. M. and Schmid-Hempel, P. (2017) 'Sexual healing: mating induces a protective  
576 immune response in bumblebees', *Journal of evolutionary biology*, 30(1), pp. 202–209.
- 577 Beadle, K. *et al.* (2019) 'Genomic insights into neonicotinoid sensitivity in the solitary bee *Osmia*  
578 *bicornis*', *PLoS genetics*, 15(2), p. e1007903.
- 579 Bebane, P. S. A. *et al.* (2019) 'The effects of the neonicotinoid imidacloprid on gene expression  
580 and DNA methylation in the buff-tailed bumblebee *Bombus terrestris*', *Proceedings. Biological*  
581 *sciences / The Royal Society*, 286(1905), p. 20190718.
- 582 Beckage, N. E. (2008) 'Insect immunology'. Academic Press, New York.
- 583 Blacquière, T. *et al.* (2012) 'Neonicotinoids in bees: a review on concentrations, side-effects and  
584 risk assessment', *Ecotoxicology*, 21(4), pp. 973–992.
- 585 Boff, S. *et al.* (2021) 'Survival rate and changes in foraging performances of solitary bees exposed  
586 to a novel insecticide', *Ecotoxicology and environmental safety*, 211, p. 111869.
- 587 Bonasio, R. *et al.* (2010) 'Genomic comparison of the ants *Camponotus floridanus* and



- 588 *Harpegnathos saltator*, *Science*, 329(5995), pp. 1068–1071.
- 589 Bramke, K. *et al.* (2019) 'Exposure of larvae of the solitary bee *Osmia bicornis* to the honey bee  
590 pathogen *Nosema ceranae* affects life history', *Insects*, 10(11). doi: 10.3390/insects10110380.
- 591 Brandt, A. *et al.* (2017) 'Immunosuppression in honeybee queens by the neonicotinoids thiacloprid  
592 and clothianidin', *Scientific reports*, 7(1), p. 4673.
- 593 Brandt, A. *et al.* (2020) 'Immunosuppression response to the neonicotinoid insecticide thiacloprid in  
594 females and males of the red mason bee *Osmia bicornis* L', *Scientific reports*, 10(1), p. 4670.
- 595 Bray, N. L. *et al.* (2016) 'Near-optimal probabilistic RNA-seq quantification', *Nature biotechnology*,  
596 34(5), pp. 525–527.
- 597 Brown, M. J. F. and Paxton, R. J. (2009) 'The conservation of bees: a global perspective',  
598 *Apidologie*, 40(3), pp. 410–416.
- 599 Brutscher, L. M., Daughenbaugh, K. F. and Flenniken, M. L. (2015) 'Antiviral defense mechanisms  
600 in honey bees', *Current opinion in insect science*, 10, pp. 71–82.
- 601 Calderone, N. W. (2012) 'Insect pollinated crops, insect pollinators and US agriculture: Trend  
602 analysis of aggregate data for the period 1992–2009', *PLoS ONE*, p. e37235. doi:  
603 10.1371/journal.pone.0037235.
- 604 Calleri, D. V. *et al.* (2006) 'Inbreeding and disease resistance in a social insect: effects of  
605 heterozygosity on immunocompetence in the termite *Zootermopsis angusticollis*', *Proceedings of  
606 the Royal Society B: Biological Sciences*, pp. 2633–2640. doi: 10.1098/rspb.2006.3622.
- 607 Casteels, P. *et al.* (1990) 'Isolation and characterization of abaecin, a major antibacterial response  
608 peptide in the honeybee (*Apis mellifera*)', *European Journal of Biochemistry*, pp. 381–386. doi:  
609 10.1111/j.1432-1033.1990.tb15315.x.
- 610 Casteels, P. *et al.* (1993) 'Functional and chemical characterization of Hymenoptaecin, an  
611 antibacterial polypeptide that is infection-inducible in the honeybee (*Apis mellifera*)', *The Journal of  
612 biological chemistry*, 268(10), pp. 7044–7054.
- 613 Chaimanee, V. *et al.* (2016) 'Sperm viability and gene expression in honey bee queens (*Apis  
614 mellifera*) following exposure to the neonicotinoid insecticide imidacloprid and the  
615 organophosphate acaricide coumaphos', *Journal of insect physiology*, 89, pp. 1–8.
- 616 Chen, J., Nolte, V. and Schlötterer, C. (2015) 'Temperature-related reaction norms of gene  
617 expression: Regulatory architecture and functional implications', *Molecular biology and evolution*,  
618 32(9), pp. 2393–2402.
- 619 Chen, S. *et al.* (2018) 'fastp: an ultra-fast all-in-one FASTQ preprocessor', *Bioinformatics*, 34(17),  
620 pp. i884–i890.
- 621 Chmiel, J. A. *et al.* (2019) 'Deleterious effects of neonicotinoid pesticides on *Drosophila  
622 melanogaster* immune pathways', *mBio*, 10(5). doi: 10.1128/mBio.01395-19.
- 623 Christophides, G. K. *et al.* (2002) 'Immunity-related genes and gene families in *Anopheles  
624 gambiae*', *Science*, 298(5591), pp. 159–165.
- 625 Claus, G. *et al.* (2021) 'Larval oral exposure to thiacloprid: Dose-response toxicity testing in solitary  
626 bees, *Osmia* spp. (Hymenoptera: Megachilidae)', *Ecotoxicology and environmental safety*, 215, p.  
627 112143.

- 628 Colgan, T. J. *et al.* (2011) 'Polyphenism in social insects: insights from a transcriptome-wide  
629 analysis of gene expression in the life stages of the key pollinator, *Bombus terrestris*', *BMC*  
630 *genomics*, 12, p. 623.
- 631 Colgan, T. J. *et al.* (2019) 'Mating induces selective immune priming which is maintained  
632 throughout bumblebee queen diapause', *BMC Genomics*. Available at:  
633 <https://europepmc.org/article/ppr/ppr143125>.
- 634 Colinet, D. *et al.* (2011) 'Extracellular superoxide dismutase in insects: characterization, function,  
635 and interspecific variation in parasitoid wasp venom', *The Journal of biological chemistry*, 286(46),  
636 pp. 40110–40121.
- 637 Combes, C. (2001) *Parasitism: The ecology and evolution of intimate interactions*. University of  
638 Chicago Press.
- 639 DeGrandi-Hoffman, G. and Chen, Y. (2015) 'Nutrition, immunity and viral infections in honey bees',  
640 *Current opinion in insect science*, 10, pp. 170–176.
- 641 De Gregorio, E. *et al.* (2002) 'The Toll and Imd pathways are the major regulators of the immune  
642 response in *Drosophila*', *The EMBO journal*, 21(11), pp. 2568–2579.
- 643 Di Prisco, G. *et al.* (2013) 'Neonicotinoid clothianidin adversely affects insect immunity and  
644 promotes replication of a viral pathogen in honey bees', *Proceedings of the National Academy of*  
645 *Sciences of the United States of America*, 110(46), pp. 18466–18471.
- 646 Dmochowska-Ślęzak, K. *et al.* (2015) 'Variations in antioxidant defense during the development of  
647 the solitary bee *Osmia bicornis*', *Apidologie*, 46(4), pp. 432–444.
- 648 Dobin, A. *et al.* (2013) 'STAR: ultrafast universal RNA-seq aligner', *Bioinformatics*, 29(1), pp. 15–  
649 21.
- 650 Dong, J. *et al.* (2020) 'Novel characteristics of immune responsive protein IRP30 in the bumble bee  
651 *Bombus lantschouensis* (Hymenoptera: Apidae)', *Journal of insect science*, 20(2). doi:  
652 10.1093/jisesa/ieaa017.
- 653 Durinck, S. *et al.* (2009) 'Mapping identifiers for the integration of genomic datasets with the  
654 R/Bioconductor package biomaRt', *Nature protocols*, 4(8), pp. 1184–1191.
- 655 Emms, D. M. and Kelly, S. (2019) 'OrthoFinder: phylogenetic orthology inference for comparative  
656 genomics', *Genome biology*, 20(1), p. 238.
- 657 *European Red List of Bees* (2014).
- 658 Evans, J. D. *et al.* (2006) 'Immune pathways and defence mechanisms in honey bees *Apis*  
659 *mellifera*', *Insect molecular biology*, 15(5), pp. 645–656.
- 660 Ewels, P. *et al.* (2016) 'MultiQC: summarize analysis results for multiple tools and samples in a  
661 single report', *Bioinformatics*, 32(19), pp. 3047–3048.
- 662 Fish, E. N. (2008) 'The X-files in immunity: sex-based differences predispose immune responses',  
663 *Nature reviews. Immunology*, 8(9), pp. 737–744.
- 664 Galiana-Arnoux, D. *et al.* (2006) 'Essential function *in vivo* for Dicer-2 in host defense against RNA  
665 viruses in *Drosophila*', *Nature immunology*, 7(6), pp. 590–597.
- 666 Gallai, N. *et al.* (2009) 'Economic valuation of the vulnerability of world agriculture confronted with  
667 pollinator decline', *Ecological economics: the journal of the International Society for Ecological*

- 668 *Economics*, 68(3), pp. 810–821.
- 669 Gerardo, N. M. *et al.* (2010) 'Immunity and other defenses in pea aphids, *Acyrtosiphon pisum*',  
670 *Genome biology*, 11(2), p. R21.
- 671 Gill, R. J., Ramos-Rodriguez, O. and Raine, N. E. (2012) 'Combined pesticide exposure severely  
672 affects individual- and colony-level traits in bees', *Nature*, 491(7422), pp. 105–108.
- 673 Goulson, D. *et al.* (2015) 'Bee declines driven by combined stress from parasites, pesticides, and  
674 lack of flowers', *Science*, 347(6229), p. 1255957.
- 675 Gruber, B. *et al.* (2011) 'On managing the red mason bee (*Osmia bicornis*) in apple orchards',  
676 *Apidologie*, 42(5). doi: 10.1007/s13592-011-0059-z.
- 677 Harpur, B. A. and Zayed, A. (2013) 'Accelerated evolution of innate immunity proteins in social  
678 insects: Adaptive evolution or relaxed constraint?', *Molecular Biology and Evolution*, pp. 1665–  
679 1674. doi: 10.1093/molbev/mst061.
- 680 Hill-Burns, E. M. and Clark, A. G. (2009) 'X-linked variation in immune response in *Drosophila*  
681 *melanogaster*', *Genetics*, 183(4), pp. 1477–1491.
- 682 Hoffmann, J. A. (1995) 'Innate immunity of insects', *Current Opinion in Immunology*, pp. 4–10. doi:  
683 10.1016/0952-7915(95)80022-0.
- 684 Hoffmann, J. A. and Hetru, C. (1992) 'Insect defensins: inducible antibacterial peptides',  
685 *Immunology Today*, pp. 411–415. doi: 10.1016/0167-5699(92)90092-I.
- 686 Imler, J.-L. and Bulet, P. (2005) 'Antimicrobial peptides in *Drosophila*: structures, activities and  
687 gene regulation', *Chemical immunology and allergy*, 86, pp. 1–21.
- 688 Ingersoll, M. A. (2017) 'Sex differences shape the response to infectious diseases', *PLoS*  
689 *pathogens*, 13(12), p. e1006688.
- 690 James, R. R. and Xu, J. (2012) 'Mechanisms by which pesticides affect insect immunity', *Journal of*  
691 *invertebrate pathology*, 109(2), pp. 175–182.
- 692 Jeschke, P. and Nauen, R. (2008) 'Neonicotinoids-from zero to hero in insecticide chemistry', *Pest*  
693 *management science*, 64(11), pp. 1084–1098.
- 694 Jiggins, F. M. and Kim, K. W. (2007) 'A screen for immunity genes evolving under positive  
695 selection in *Drosophila*', *Journal of evolutionary biology*, 20(3), pp. 965–970.
- 696 Jones, P. *et al.* (2014) 'InterProScan 5: genome-scale protein function classification',  
697 *Bioinformatics*, 30(9), pp. 1236–1240.
- 698 Joseph, S. B. and Kirkpatrick, M. (2004) 'Haploid selection in animals', *Trends in ecology &*  
699 *evolution*, 19(11), pp. 592–597.
- 700 Kinsella, R. J. *et al.* (2011) 'Ensembl BioMarts: a hub for data retrieval across taxonomic space',  
701 *Database: the journal of biological databases and curation*, 2011, p. bar030.
- 702 Klein, A.-M., Steffan-Dewenter, I. and Tscharntke, T. (2003) 'Fruit set of highland coffee increases  
703 with the diversity of pollinating bees', *Proceedings. Biological sciences / The Royal Society*,  
704 270(1518), pp. 955–961.
- 705 Klein, S. L. and Flanagan, K. L. (2016) 'Sex differences in immune responses', *Nature reviews.*  
706 *Immunology*, 16(10), pp. 626–638.

- 707 Korayem, A. M. *et al.* (2004) 'A *Drosophila* salivary gland mucin is also expressed in immune  
708 tissues: evidence for a function in coagulation and the entrapment of bacteria', *Insect biochemistry  
709 and molecular biology*, 34(12), pp. 1297–1304.
- 710 Kubrak, O. I. *et al.* (2014) 'The sleeping beauty: how reproductive diapause affects hormone  
711 signaling, metabolism, immune response and somatic maintenance in *Drosophila melanogaster*',  
712 *PloS one*, 9(11), p. e113051.
- 713 Lavine, M. D. and Strand, M. R. (2002) 'Insect hemocytes and their role in immunity', *Insect  
714 Biochemistry and Molecular Biology*, pp. 1295–1309. doi: 10.1016/s0965-1748(02)00092-9.
- 715 Lawniczak, M. K. N. *et al.* (2007) 'Mating and immunity in invertebrates', *Trends in ecology &  
716 evolution*, 22(1), pp. 48–55.
- 717 Losey, J. E. and Vaughan, M. (2006) 'The economic value of ecological services provided by  
718 insects', *Bioscience*, 56(4), pp. 311–323.
- 719 Love, M. I., Huber, W. and Anders, S. (2014) 'Moderated estimation of fold change and dispersion  
720 for RNA-seq data with DESeq2', *Genome biology*, 15(12), p. 550.
- 721 Manjon, C. *et al.* (2018) 'Unravelling the molecular determinants of bee sensitivity to neonicotinoid  
722 insecticides', *Current biology: CB*, 28(7), pp. 1137–1143.e5.
- 723 Mason, R. *et al.* (2013) 'Immune suppression by neonicotinoid insecticides at the root of global  
724 wildlife declines', *Journal of environmental immunology and toxicology*, 1(1), p. 3.
- 725 Matsuda, K. *et al.* (2001) 'Neonicotinoids: insecticides acting on insect nicotinic acetylcholine  
726 receptors', *Trends in pharmacological sciences*, 22(11), pp. 573–580.
- 727 Moffat, C. *et al.* (2015) 'Chronic exposure to neonicotinoids increases neuronal vulnerability to  
728 mitochondrial dysfunction in the bumblebee (*Bombus terrestris*)', *FASEB journal: official publication  
729 of the Federation of American Societies for Experimental Biology*, 29(5), pp. 2112–2119.
- 730 Moffat, C. *et al.* (2016) 'Neonicotinoids target distinct nicotinic acetylcholine receptors and neurons,  
731 leading to differential risks to bumblebees', *Scientific reports*, 6, p. 24764.
- 732 Mokkaapati, J. S., Bednarska, A. J. and Laskowski, R. (2021) 'The development of the solitary bee  
733 *Osmia bicornis* is affected by some insecticide agrochemicals at environmentally relevant  
734 concentrations', *The Science of the total environment*, 775, p. 145588.
- 735 Moret, Y. and Schmid-Hempel, P. (2000) 'Survival for immunity: the price of immune system  
736 activation for bumblebee workers', *Science*, 290(5494), pp. 1166–1168.
- 737 Nakamura, A. *et al.* (2011) 'Innate immune system still works at diapause, a physiological state of  
738 dormancy in insects', *Biochemical and biophysical research communications*, 410(2), pp. 351–357.
- 739 'Neonicotinoids, bee disorders and the sustainability of pollinator services' (2013) *Current Opinion  
740 in Environmental Sustainability*, 5(3-4), pp. 293–305.
- 741 Ni, W. *et al.* (2020) 'Hemocytin facilitates host immune responses against *Nosema bombycis*',  
742 *Developmental and comparative immunology*, 103, p. 103495.
- 743 O'Donnell, S. and Beshers, S. N. (2004) 'The role of male disease susceptibility in the evolution of  
744 haplodiploid insect societies', *Proceedings. Biological sciences / The Royal Society*, 271(1542), pp.  
745 979–983.
- 746 Pace, K. E. and Baum, L. G. (2002) 'Insect galectins: roles in immunity and development',



- 747 *Glycoconjugate journal*, 19(7-9), pp. 607–614.
- 748 Pamilo, P. and Crozier, R. H. (1981) 'Genic variation in male haploids under deterministic  
749 selection', *Genetics*, 98(1), pp. 199–214.
- 750 Parsch, J. and Ellegren, H. (2013) 'The evolutionary causes and consequences of sex-biased gene  
751 expression', *Nature reviews. Genetics*, 14(2), pp. 83–87.
- 752 Peng, J., Zipperlen, P. and Kubli, E. (2005) 'Drosophila sex-peptide stimulates female innate  
753 immune system after mating via the Toll and Imd pathways', *Current biology: CB*, 15(18), pp.  
754 1690–1694.
- 755 Rao, X.-J. *et al.* (2016) 'Characterization of a dual-CRD galectin in the silkworm *Bombyx mori*',  
756 *Developmental and comparative immunology*, 60, pp. 149–159.
- 757 Rees, J. A., Moniatte, M. and Bulet, P. (1997) 'Novel antibacterial peptides isolated from a  
758 European bumblebee, *Bombus pascuorum* (Hymenoptera, Apoidea)', *Insect biochemistry and  
759 molecular biology*, 27(5), pp. 413–422.
- 760 Retschnig, G. *et al.* (2014) 'Sex-specific differences in pathogen susceptibility in honey bees (*Apis  
761 mellifera*)', *PloS one*, 9(1), p. e85261.
- 762 Rogers, L. J., Frasnelli, E. and Versace, E. (2016) 'Lateralized antennal control of aggression and  
763 sex differences in red mason bees, *Osmia bicornis*', *Scientific reports*, 6, p. 29411.
- 764 Rolff, J. and Reynolds, S. (2009) *Insect infection and immunity: Evolution, ecology, and  
765 mechanisms*. OUP Oxford.
- 766 Rolff, J. and Siva-Jothy, M. T. (2003) 'Invertebrate ecological immunology', *Science*, 301(5632),  
767 pp. 472–475.
- 768 Roux, J. *et al.* (2014) 'Patterns of positive selection in seven ant genomes', *Molecular biology and  
769 evolution*, 31(7), pp. 1661–1685.
- 770 Ruddle, N. *et al.* (2018) 'Effects of exposure to winter oilseed rape grown from thiamethoxam-  
771 treated seed on the red mason bee *Osmia bicornis*', *Environmental toxicology and chemistry /  
772 SETAC*, 37(4), pp. 1071–1083.
- 773 Ruiz-González, M. X. and Brown, M. J. F. (2006) 'Males vs workers: testing the assumptions of the  
774 haploid susceptibility hypothesis in bumblebees', *Behavioral ecology and sociobiology*, 60(4), pp.  
775 501–509.
- 776 Sackton, T. B. *et al.* (2007) 'Dynamic evolution of the innate immune system in *Drosophila*', *Nature  
777 genetics*, 39(12), pp. 1461–1468.
- 778 Sadd, B. M. *et al.* (2015) 'The genomes of two key bumblebee species with primitive eusocial  
779 organization', *Genome biology*, 16, p. 76.
- 780 Sadd, B. M. and Schmid-Hempel, P. (2008) 'PERSPECTIVE: Principles of ecological immunology',  
781 *Evolutionary applications*, 2(1), pp. 113–121.
- 782 Sadd, B. M. and Schmid-Hempel, P. (2009) 'Ecological and evolutionary implications of specific  
783 immune responses', *Insect Infection and Immunity*, pp. 225–240. doi:  
784 10.1093/acprof:oso/9780199551354.003.0014.
- 785 Sandrock, C. *et al.* (2014) 'Sublethal neonicotinoid insecticide exposure reduces solitary bee  
786 reproductive success', *Agricultural and forest entomology*, 16(2), pp. 119–128.

- 787 Schoonvaere, K. *et al.* (2018) 'Study of the metatranscriptome of eight social and solitary wild bee  
788 species reveals novel viruses and bee parasites', *Frontiers in microbiology*, 9, p. 177.
- 789 Schwenke, R. A., Lazzaro, B. P. and Wolfner, M. F. (2016) 'Reproduction-immunity trade-offs in  
790 insects', *Annual review of entomology*, 61, pp. 239–256.
- 791 Seidelmann, K. (2006) 'Open-cell parasitism shapes maternal investment patterns in the red  
792 mason bee *Osmia rufa*', *Behavioral Ecology*, pp. 839–848. doi: 10.1093/beheco/arl017.
- 793 Shen, S. *et al.* (2014) 'rMATS: robust and flexible detection of differential alternative splicing from  
794 replicate RNA-Seq data', *Proceedings of the National Academy of Sciences of the United States of  
795 America*, 111(51), pp. E5593–601.
- 796 Shultz, A. J. and Sackton, T. B. (2019) 'Immune genes are hotspots of shared positive selection  
797 across birds and mammals', *eLife*, 8. doi: 10.7554/eLife.41815.
- 798 Shumate, A. and Salzberg, S. L. (2020) 'Liftoff: accurate mapping of gene annotations',  
799 *Bioinformatics* . doi: 10.1093/bioinformatics/btaa1016.
- 800 Siviter, H. *et al.* (2018) 'Quantifying the impact of pesticides on learning and memory in bees', *The  
801 Journal of applied ecology*. Edited by M. Pocock, 19, p. 915.
- 802 Stanley, D. A., Smith, K. E. and Raine, N. E. (2015) 'Bumblebee learning and memory is impaired  
803 by chronic exposure to a neonicotinoid pesticide', *Scientific reports*, 5, p. 16508.
- 804 Straub, F. *et al.* (2021) 'Negative effects of the neonicotinoid clothianidin on foraging behavior and  
805 antennal sensitivity in two common pollinator species, *Osmia bicornis* and *Bombus terrestris*',  
806 *Frontiers in Ecology and Evolution*, 9. doi: 10.3389/fevo.2021.697355.
- 807 Szentgyörgyi, H. *et al.* (2017) 'Forewing structure of the solitary bee *Osmia bicornis* developing on  
808 heavy metal pollution gradient', *Ecotoxicology* , 26(8), pp. 1031–1040.
- 809 Tian *et al.* (2018) 'Infection with the multi-host micro-parasite *Apicystis bombi* (Apicomplexa:  
810 Neogregarinorida) decreases survival of the solitary bee *Osmia bicornis*', *Journal of Invertebrate  
811 Pathology*, pp. 43–45. doi: 10.1016/j.jip.2018.09.005.
- 812 Troczka, B. J. *et al.* (2019) 'Identification and functional characterisation of a novel N-cyanoamidine  
813 neonicotinoid metabolising cytochrome P450, CYP9Q6, from the buff-tailed bumblebee *Bombus  
814 terrestris*', *Insect biochemistry and molecular biology*, 111, p. 103171.
- 815 Vanengelsdorp, D. and Meixner, M. D. (2010) 'A historical review of managed honey bee  
816 populations in Europe and the United States and the factors that may affect them', *Journal of  
817 invertebrate pathology*, 103 Suppl 1, pp. S80–95.
- 818 Viljakainen, L. *et al.* (2009) 'Rapid evolution of immune proteins in social insects', *Molecular  
819 biology and evolution*, 26(8), pp. 1791–1801.
- 820 Viljakainen, L. (2015) 'Evolutionary genetics of insect innate immunity', *Briefings in Functional  
821 Genomics*, pp. 407–412. doi: 10.1093/bfpg/elv002.
- 822 Waterhouse, R. M. *et al.* (2007) 'Evolutionary dynamics of immune-related genes and pathways in  
823 disease-vector mosquitoes', *Science*, 316(5832), pp. 1738–1743.
- 824 Werren, J. H. *et al.* (2010) 'Functional and evolutionary insights from the genomes of three  
825 parasitoid *Nasonia* species', *Science*, 327(5963), pp. 343–348.
- 826 Woodcock, B. A. *et al.* (2017) 'Country-specific effects of neonicotinoid pesticides on honey bees

827 and wild bees', *Science*, 356(6345), pp. 1393–1395.

828 Xu, J. and James, R. R. (2012) 'Temperature stress affects the expression of immune response  
829 genes in the alfalfa leafcutting bee, *Megachile rotundata*', *Insect molecular biology*, 21(2), pp. 269–  
830 280.



831 **Figures**

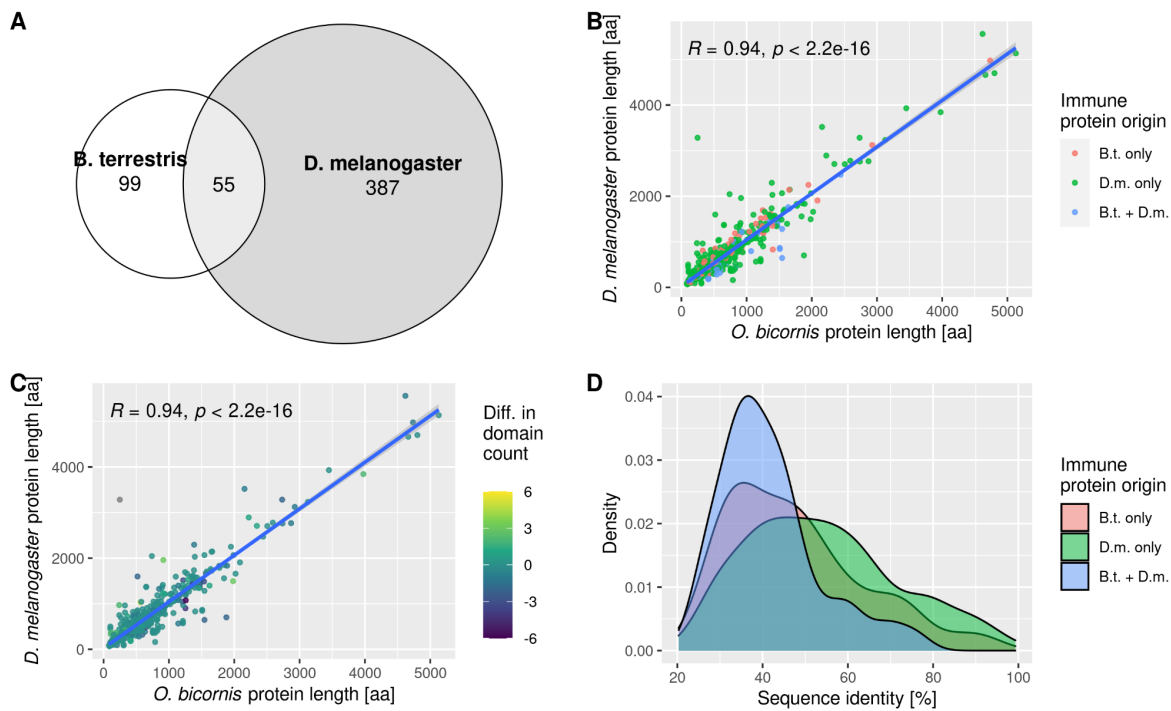

832 **Figure 1. Expanded repertoire of putative immune genes in the red mason bee, *Osmia bicornis*.** (A)  
 833 Overlap of putative *O. bicornis* immune genes inferred via homology to *B. terrestris* and *D. melanogaster*. (B-  
 834 C) Correlation of protein lengths (amino acids) and number of functional domains shared between *O.*  
 835 *bicornis* and *D. melanogaster* protein homologues with colours indicating (B) immune gene set where  
 836 homology was found (“B.t. only” = homologues identified through comparison with *B. terrestris*; “D.m. only” =  
 837 homologues identified through comparison with *D. melanogaster*; “B.t.+D.m.” = homologues identified in  
 838 comparisons with both species) and (C) difference in number of domains (yellow: higher domain count in *D.*  
 839 *melanogaster*, purple: higher domain count in *O. bicornis*). (D) Distribution of sequence identity (percentage  
 840 of identical amino acid positions) of homologous protein pairs between *D. melanogaster* and *O. bicornis* for  
 841 putative *O. bicornis* immune proteins. Colours indicate the species through which homologues were  
 842 identified.

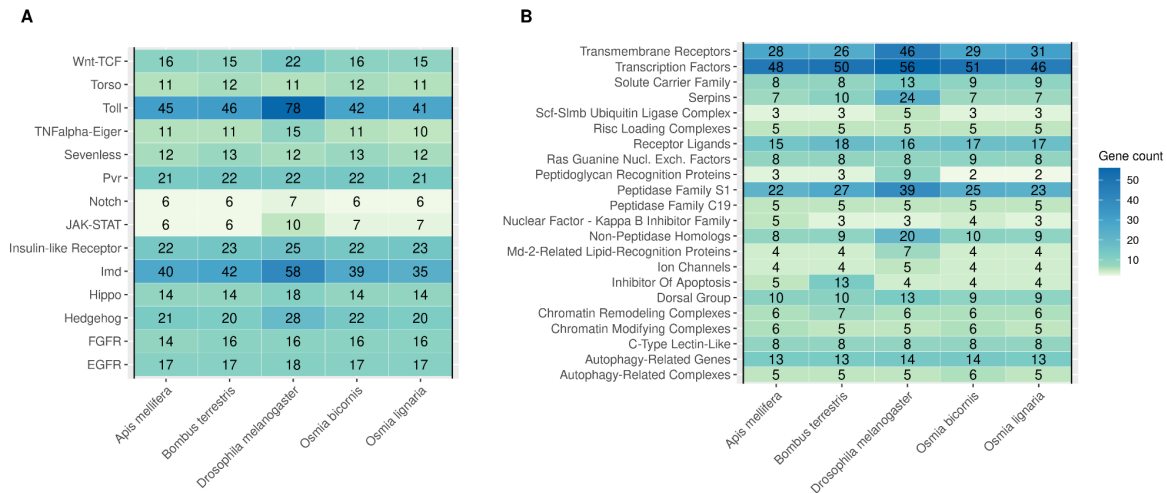

843 **Figure 2. Conservation of immune genes and pathways in *Osmia bicornis*.** Heatmaps depicting gene  
 844 counts of homologues of putative *O. bicornis* immune genes for **(A)** molecular signaling pathways and **(B)**  
 845 non-pathway gene families in closely related hymenopterans (*Apis mellifera*, *Bombus terrestris*, *Osmia*  
 846 *lignaria*) and the more distantly related *Drosophila melanogaster*. For each species the number of  
 847 homologues are shown.

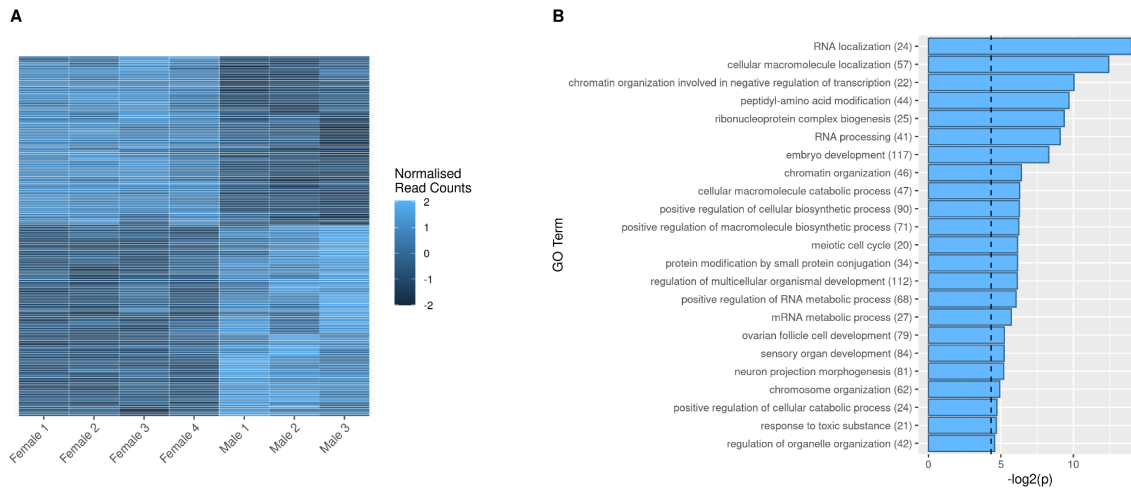

848 **Figure 3. Differential expression of putative *Osmia bicornis* immune genes between males and**  
 849 **females. (A)** Heatmap showing normalised (variance stabilisation transformed) read counts per sample for  
 850 significantly differentially expressed (BH adjusted  $p < 0.05$ ) immune genes between males and females. **(B)**  
 851 Functional enrichment of biological process GO terms of significantly differentially expressed putative *O.*  
 852 *bicornis* immune genes. The x axis depicts negative log-transformed  $p$  values with the dashed vertical line  
 853 corresponding to a  $p$  value confidence threshold of 0.05. Each line on the y axis corresponds to a GO term  
 854 description with the numbers in brackets indicating the number of genes annotated with that specific term in  
 855 the GO term database.

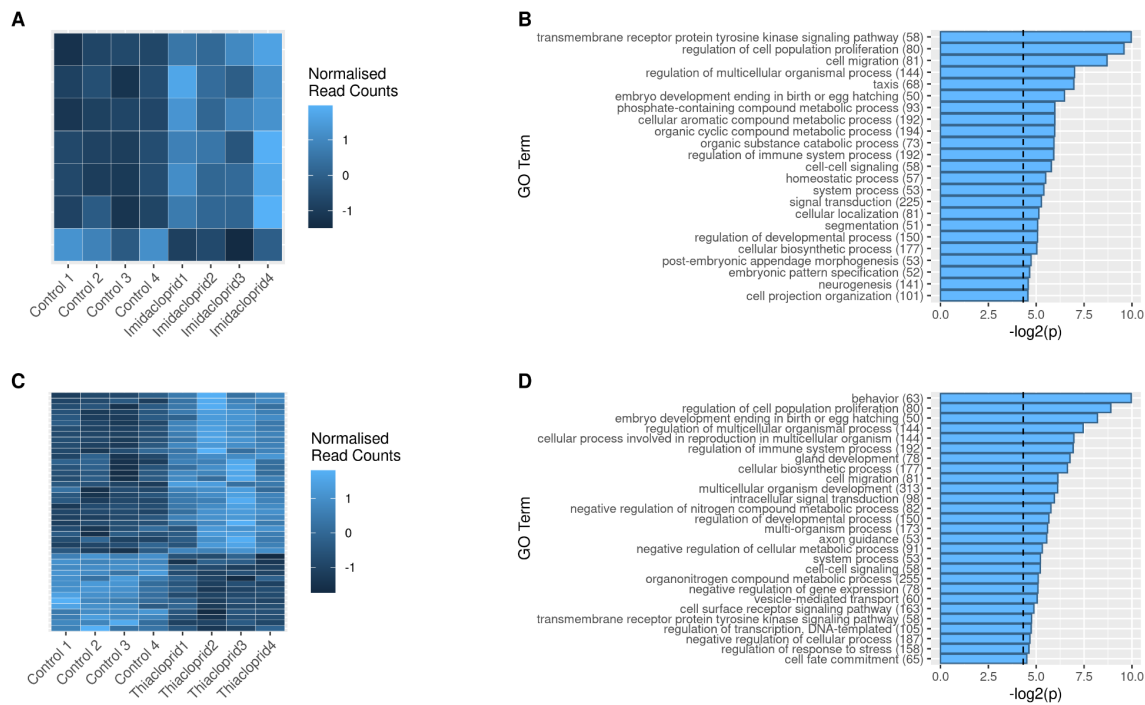

856 **Figure 4. Differential expression of putative *Osmia bicornis* immune genes between pesticide-**  
 857 **exposed and control individuals. (A,C)** Heatmap showing normalised (variance stabilisation transformed)  
 858 read counts per sample for significantly differentially expressed (BH adjusted  $p < 0.05$ ) immune genes  
 859 between control individuals and **(A)** imidacloprid-treated or **(C)** thiacloprid-treated individuals. **(B,D)**  
 860 Functional enrichment of biological process GO terms of significantly differentially expressed putative *O.*  
 861 *bicornis* immune genes between control individuals and **(B)** imidacloprid-treated individuals or **(D)** thiacloprid-  
 862 treated individuals. The x axis depicts negative log-transformed  $p$  values with the dashed vertical line  
 863 corresponding to a  $p$  value confidence threshold of 0.05. Each line on the y axis corresponds to a GO term  
 864 description with the numbers in brackets indicating the number of genes annotated with that specific term in  
 865 the GO term database.
